# Supplementary material for: Santamarine Shows Anti-Photoaging Properties via Inhibition of MAPK/AP-1 and Stimulation of TGF-β/Smad Signaling in UVA-Irradiated HDFs
Source: MDPI journal article supplement (doi:10.3390/molecules26123585), 2021-06-11
Supplement: s1 [file s1]

# Santamarine Shows Anti-Photoaging Properties via Inhibition of MAPK/AP-1 and Stimulation of TGF- $\beta$ /Smad Signaling in UVA-Irradiated HDFs

**Authors:** Jung Hwan Oh, Junse Kim, Fatih Karadeniz, Hye Ran Kim, So Young Park, Youngwan Seo and Chang-Suk Kong

Supplementary Material – Spectrum analyses for the compounds reynosin and santamarine

Figure S1.  $^1\text{H}$ - $^1\text{H}$  COSY spectrum of reynosin.

Figure S2. gHSQC (left) and gHMBC (right) spectra of reynosin.

Figure S3.  $^1\text{H}$ - $^1\text{H}$  COSY spectrum of santamarine.

Figure S4. gHSQC (left) and gHMBC (right) spectra of santamarine.

Figure S5.  $^1\text{H}$ -NMR (a) and  $^{13}\text{C}$ -NMR (b) spectra of reynosin.

Figure S6.  $^1\text{H}$ -NMR (a) and  $^{13}\text{C}$ -NMR (b) spectra of santamarine.

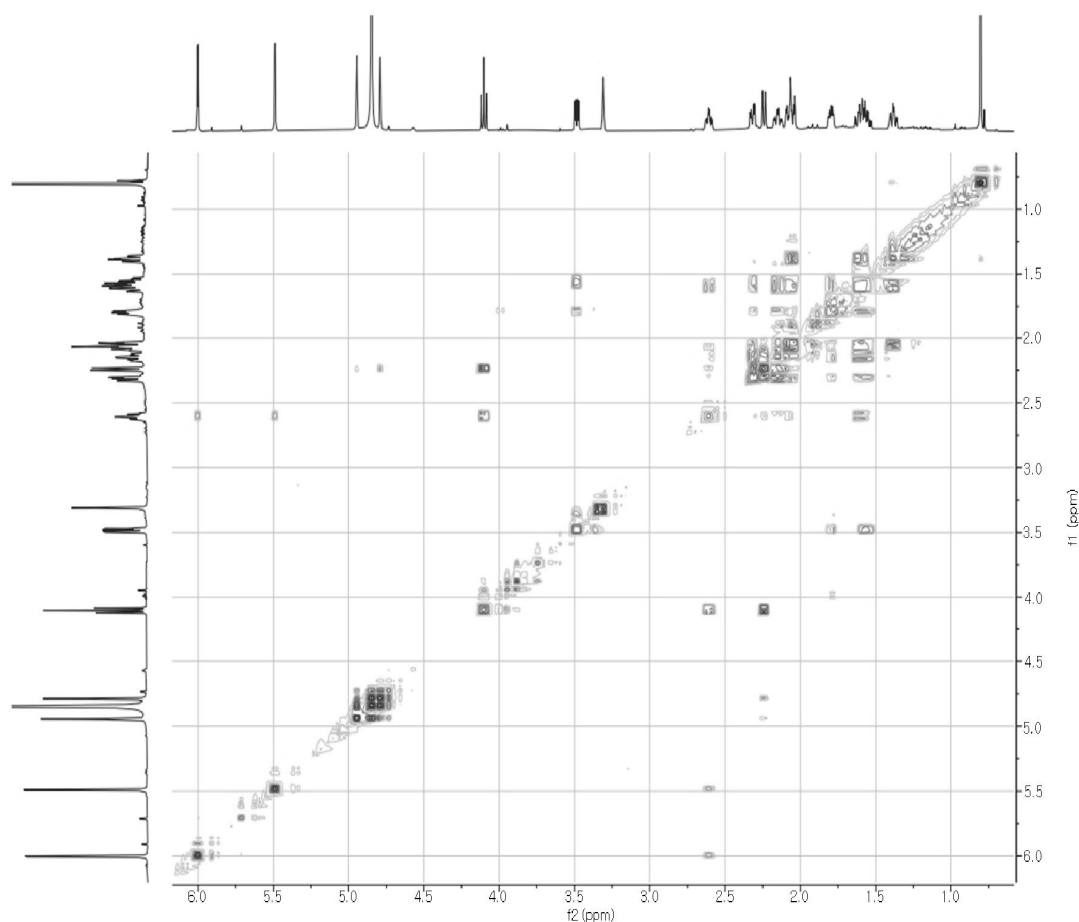

Figure S1.  $^1\text{H}$ - $^1\text{H}$  COSY spectrum of reynosin.

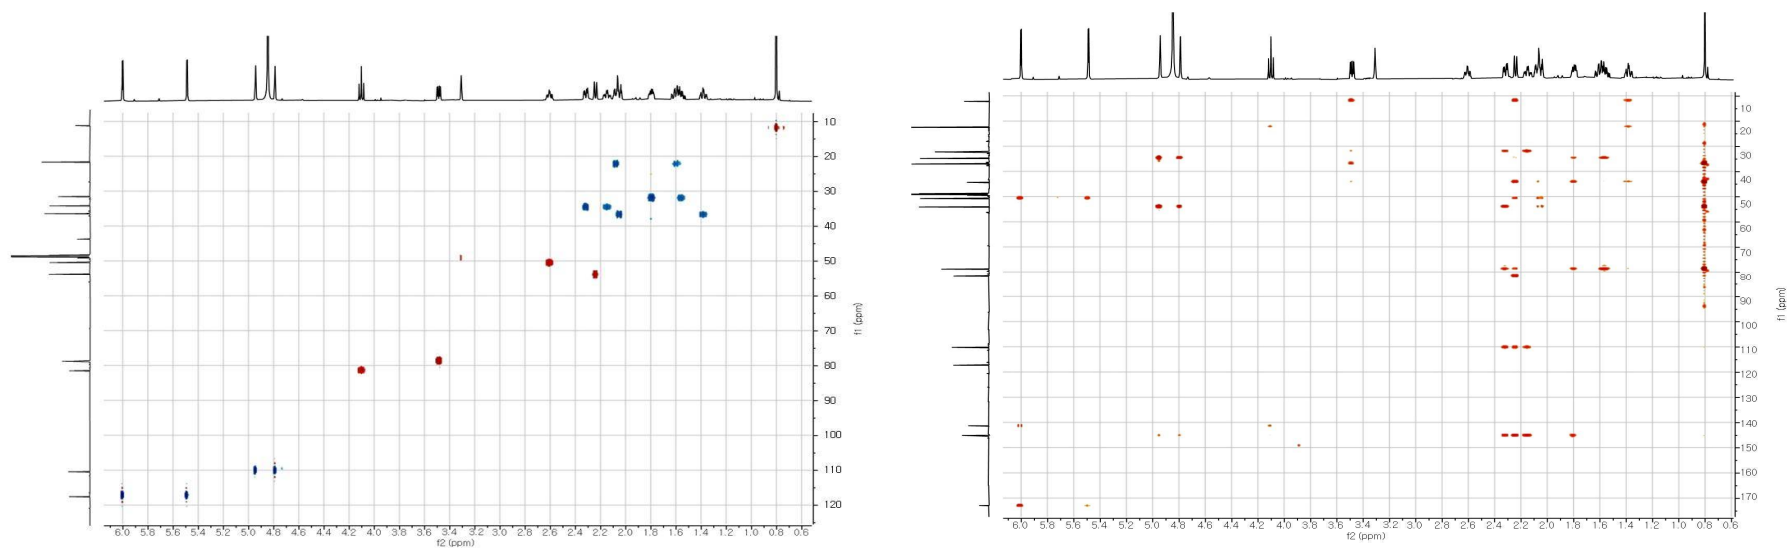

Figure S2. gHSQC (left) and gHMBC (right) spectra of reynosin

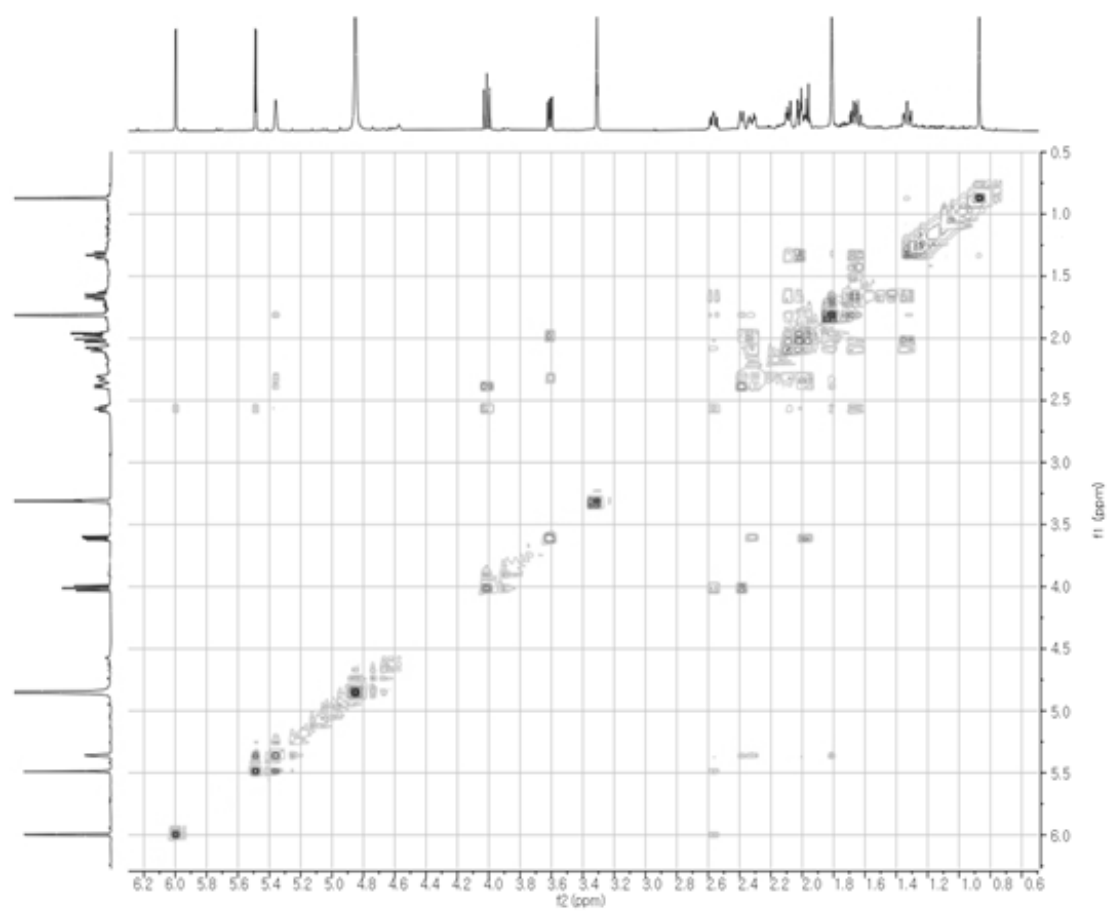

Figure S3.  $^1\text{H}$ - $^1\text{H}$  COSY spectrum of santamarine

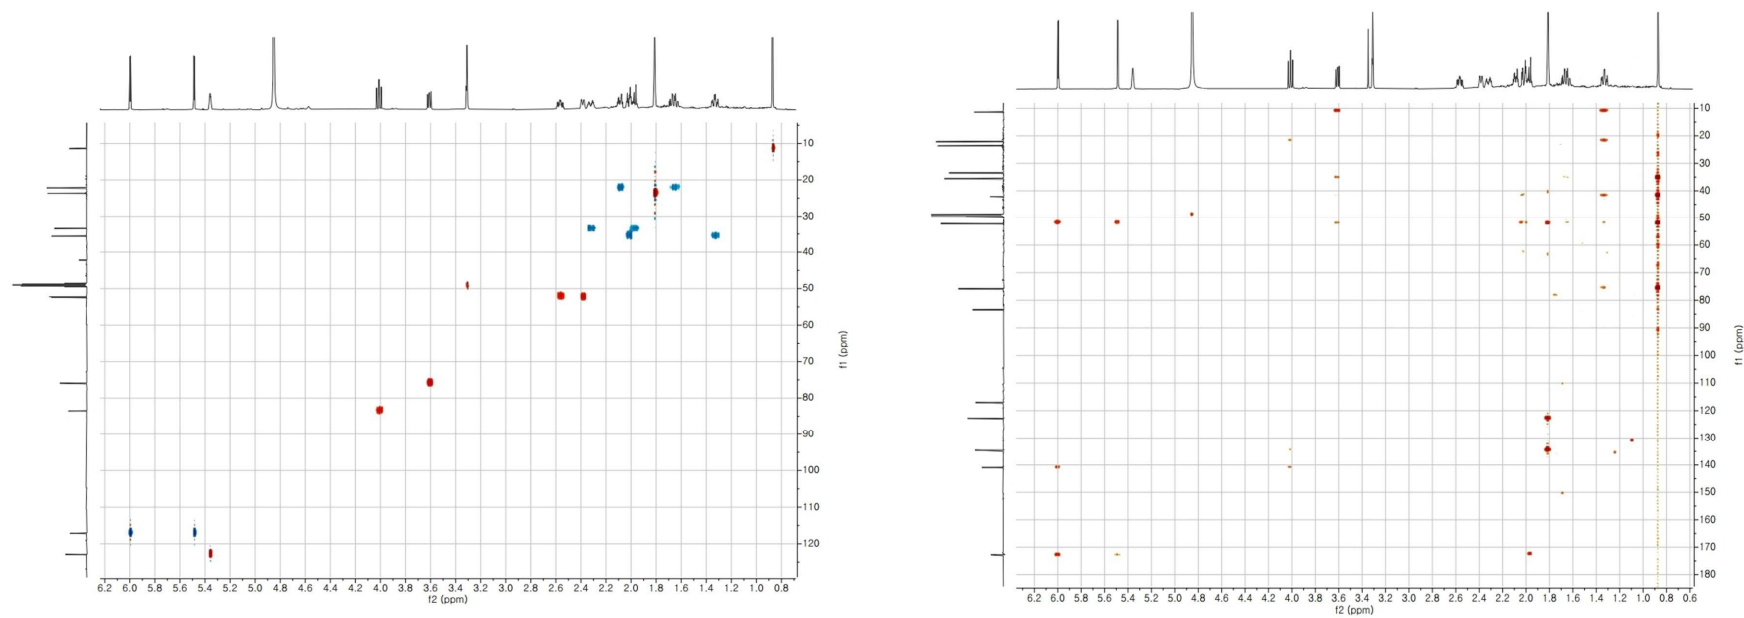

Figure S4. gHSQC (left) and gHMBC (right) spectra of santamarine

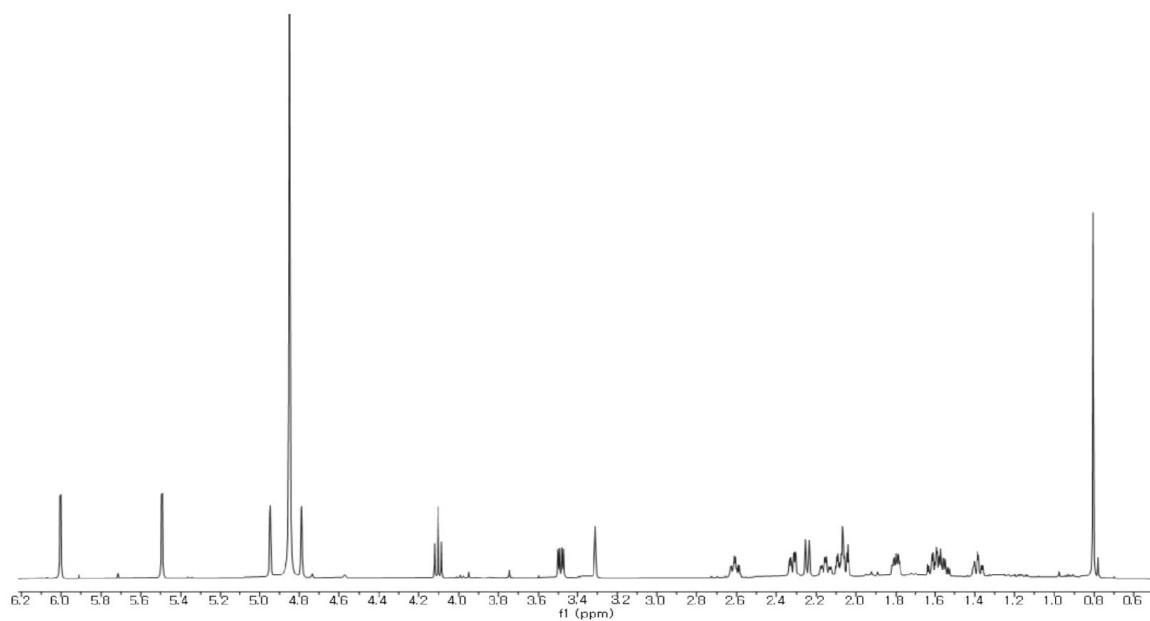

Figure S5a.  $^1\text{H}$ -NMR spectrum of reynosin.

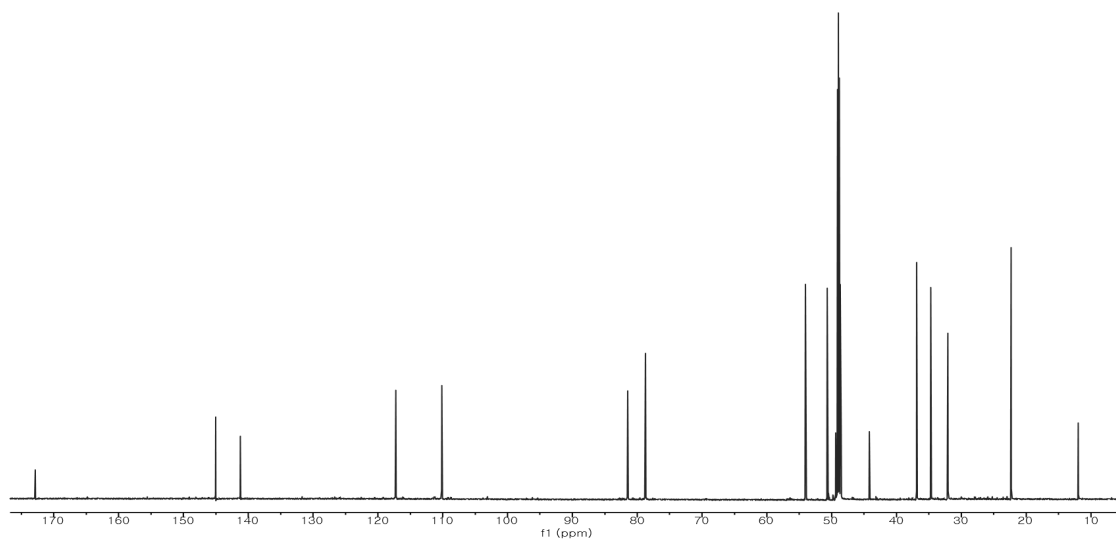

Figure S5b.  $^{13}\text{C}$ -NMR spectrum of reynosin

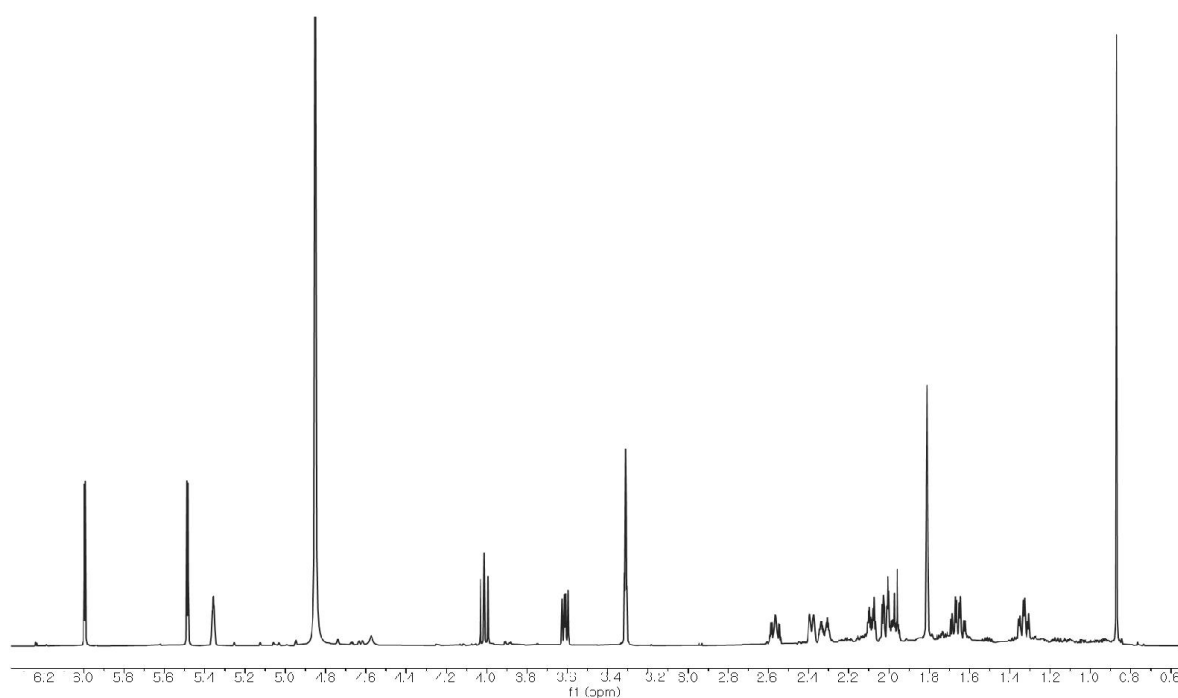

Figure S6a. <sup>1</sup>H-NMR spectrum of santamarine

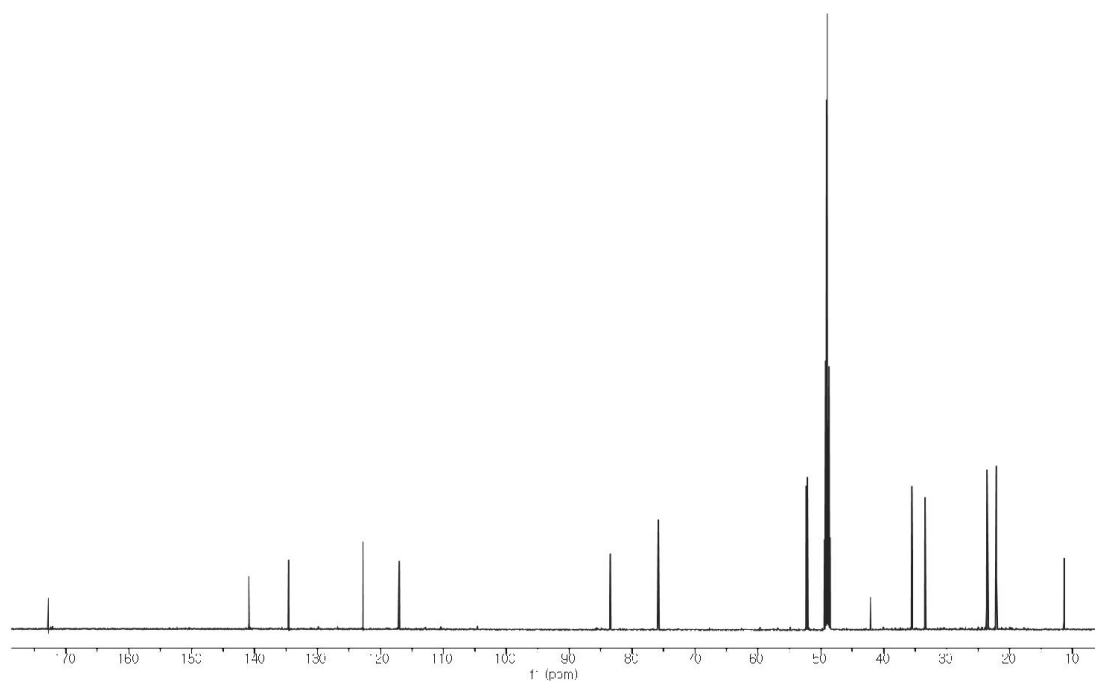

Figure S6b. <sup>13</sup>C-NMR spectrum of santamarine
